# Supplementary material for: Assessment of smoke plume height products derived from multisource satellite observations for wildfire in the western US
Source: Copernicus journal article supplement (doi:10.5194/egusphere-2023-1658), 2023-09-13
Supplement: Supplementary file 1 [file egusphere-2023-1658-supplement.pdf]

*Supplement of*

**Assessment of smoke plume height products derived from multisource satellite observations for wildfire in the western US**

**Jingting Huang et al.**

*Correspondence to:* Jingting Huang ([jingting.huang@utah.edu](mailto:jingting.huang@utah.edu))

**Table S1: Location and elevation of balloon sounding stations near the UWKA flight operations during the August 2018 BB-FLUX project.**

| Station ID | Latitude | Longitude | Elevation (m AMSL) |
|------------|----------|-----------|--------------------|
| BOI        | 43.56    | -116.21   | 874                |
| LKN        | 40.86    | -115.73   | 1608               |
| MFR        | 42.36    | -122.86   | 405                |
| SLC        | 40.77    | -111.95   | 1289               |

**Table S2: Physical schemes used in the WRF simulations. A 4-km domain across the western U.S. with a domain size of 629 × 501 (east-west direction × north-south direction) in the WRF configuration is centered at (40° N, 116° W).**

| Physical Process          | Scheme                                                      |
|---------------------------|-------------------------------------------------------------|
| Microphysics              | Purdue Lin Scheme (Chen and Sun, 2002)                      |
| Convection                | Grell–Devenyi Ensemble Scheme (Grell and Dévényi, 2002)     |
| Short/Long-wave radiation | RRTMG Shortwave and Longwave Schemes (Iacono et al., 2008)  |
| Planetary boundary layer  | Yonsei University scheme (Hong et al., 2006)                |
| Surface layer             | Revised MM5 Scheme (Jiménez et al., 2012)                   |
| Land surface              | Unified Noah Land Surface Model (Mukul Tewari et al., 2004) |

**Table S3: Statistical evaluation of satellite-retrieved wildfire *SPH* products against WCL-determined *SPH* observations using the spatial averaging method. *N* – the number of collocated pairs; *STD* – standard deviation; *Q25* – lower quartile, 25% of the data lie below this value; *Q50* – median, 50% of the data lie below this value; *Q75* – upper quartile, 25% of the data lie above this value; *MB* – mean bias; *MAE* – mean absolute error; *RMSE* – root mean square error; *r* – Pearson’s correlation coefficient score.**

|                                                                | WCL-Determined <i>SPH</i> |                          |
|----------------------------------------------------------------|---------------------------|--------------------------|
|                                                                | <i>SPH<sup>top</sup></i>  | <i>SPH<sup>ext</sup></i> |
| <b>MODIS-Terra/MAIAC</b>                                       |                           |                          |
| <i>N</i>                                                       | 163                       |                          |
| Lidar Observations Mean ± 1 <i>STD</i> (km)                    | 2.162 ± 0.542             | 1.382 ± 0.368            |
| Satellite Retrievals Mean ± 1 <i>STD</i> (km)                  | 0.733 ± 0.447             |                          |
| Lidar Observations <sup>Max/Min</sup> (km)                     | 3.903/1.254               | 2.253/0.800              |
| Satellite Retrievals <sup>Max/Min</sup> (km)                   | 2.114/0.015               |                          |
| Lidar Observations <i>Q25</i> , <i>Q50</i> , <i>Q75</i> (km)   | 1.776, 2.064, 2.508       | 1.131, 1.298, 1.581      |
| Satellite Retrievals <i>Q25</i> , <i>Q50</i> , <i>Q75</i> (km) | 0.438, 0.687, 0.903       |                          |
| <i>MB</i> (km)                                                 | -1.429                    | -0.650                   |
| <i>MAE</i> (km)                                                | 1.429                     | 0.673                    |
| <i>RMSE</i> (km)                                               | 1.591                     | 0.822                    |
| <i>r</i>                                                       | 0.008                     | <b>0.247 **</b>          |
| <b>MODIS-Aqua/MAIAC</b>                                        |                           |                          |
| <i>N</i>                                                       | 114                       |                          |
| Lidar Observations Mean ± 1 <i>STD</i> (km)                    | 2.686 ± 0.797             | 1.790 ± 0.644            |

|                                                   |                     |                      |                     |
|---------------------------------------------------|---------------------|----------------------|---------------------|
| Satellite Retrievals Mean $\pm$ 1 <i>STD</i> (km) |                     | 0.425 $\pm$ 0.262    |                     |
| Lidar Observations <sup>Max/Min</sup> (km)        | 4.215/1.374         |                      | 3.422/0.800         |
| Satellite Retrievals <sup>Max/Min</sup> (km)      |                     | 0.935/0.025          |                     |
| Lidar Observations <i>Q25, Q50, Q75</i> (km)      | 2.063, 2.627, 3.350 |                      | 1.274, 1.728, 2.325 |
| Satellite Retrievals <i>Q25, Q50, Q75</i> (km)    |                     | 0.192, 0.379, 0.697  |                     |
| <i>MB</i> (km)                                    | -2.261              |                      | -1.365              |
| <i>MAE</i> (km)                                   | 2.261               |                      | 1.365               |
| <i>RMSE</i> (km)                                  | 2.393               |                      | 1.525               |
| <i>r</i>                                          | <b>0.219 *</b>      |                      | 0.057               |
| <b>MISR/MERLIN</b>                                |                     |                      |                     |
| <i>N</i>                                          |                     | 90                   |                     |
| Lidar Observations Mean $\pm$ 1 <i>STD</i> (km)   | 2.216 $\pm$ 0.506   |                      | 1.498 $\pm$ 0.449   |
| Satellite Retrievals Mean $\pm$ 1 <i>STD</i> (km) |                     | 2.124 $\pm$ 0.625    |                     |
| Lidar Observations <sup>Max/Min</sup> (km)        | 2.982/1.254         |                      | 2.253/0.853         |
| Satellite Retrievals <sup>Max/Min</sup> (km)      |                     | 3.029/0.625          |                     |
| Lidar Observations <i>Q25, Q50, Q75</i> (km)      | 1.791, 2.204, 2.648 |                      | 1.129, 1.428, 1.969 |
| Satellite Retrievals <i>Q25, Q50, Q75</i> (km)    |                     | 1.658, 2.083, 2.801  |                     |
| <i>MB</i> (km)                                    | -0.092              |                      | 0.626               |
| <i>MAE</i> (km)                                   | 0.368               |                      | 0.719               |
| <i>RMSE</i> (km)                                  | 0.554               |                      | 0.788               |
| <i>r</i>                                          | <b>0.551 **</b>     |                      | <b>0.648 **</b>     |
| <b>VIIRS/ASHE</b>                                 |                     |                      |                     |
| <i>N</i>                                          |                     | 130                  |                     |
| Lidar Observations Mean $\pm$ 1 <i>STD</i> (km)   | 2.823 $\pm$ 0.999   |                      | 1.895 $\pm$ 0.890   |
| Satellite Retrievals Mean $\pm$ 1 <i>STD</i> (km) |                     | 2.707 $\pm$ 1.149    |                     |
| Lidar Observations <sup>Max/Min</sup> (km)        | 5.493/1.497         |                      | 4.003/0.811         |
| Satellite Retrievals <sup>Max/Min</sup> (km)      |                     | 4.603/0.227          |                     |
| Lidar Observations <i>Q25, Q50, Q75</i> (km)      | 1.977, 2.904, 3.318 |                      | 1.094, 1.629, 2.489 |
| Satellite Retrievals <i>Q25, Q50, Q75</i> (km)    |                     | 2.263, 2.6661, 3.625 |                     |
| <i>MB</i> (km)                                    | -0.106              |                      | 0.823               |
| <i>MAE</i> (km)                                   | 1.196               |                      | 1.599               |
| <i>RMSE</i> (km)                                  | 1.694               |                      | 1.814               |
| <i>r</i>                                          | <b>-0.236 *</b>     |                      | <b>-0.246 *</b>     |
| <b>TROPOMI/ALH</b>                                |                     |                      |                     |
| <i>N</i>                                          |                     | 127                  |                     |
| Lidar Observations Mean $\pm$ 1 <i>STD</i> (km)   | 2.677 $\pm$ 1.075   |                      | 1.894 $\pm$ 0.936   |
| Satellite Retrievals Mean $\pm$ 1 <i>STD</i> (km) |                     | 2.001 $\pm$ 0.541    |                     |
| Lidar Observations <sup>Max/Min</sup> (km)        | 5.493/1.374         |                      | 4.003/0.734         |
| Satellite Retrievals <sup>Max/Min</sup> (km)      |                     | 3.425/1.412          |                     |

|                                                    |                     |                     |
|----------------------------------------------------|---------------------|---------------------|
| Lidar Observations $Q_{25}, Q_{50}, Q_{75}$ (km)   | 1.718, 2.337, 3.308 | 1.019, 1.542, 2.684 |
| Satellite Retrievals $Q_{25}, Q_{50}, Q_{75}$ (km) | 1.546, 1.759, 2.391 |                     |
| $MB$ (km)                                          | -0.676              | 0.107               |
| $MAE$ (km)                                         | 0.850               | 0.843               |
| $RMSE$ (km)                                        | 1.324               | 0.980               |
| $r$                                                | 0.130               | <b>0.218 *</b>      |

Note that the Pearson's correlation coefficient scores ( $r$ ) in bold demonstrate a statistically significant relationship between the two variables; the symbol \* signifies a  $p$  value  $< 0.05$  and \*\* indicates a  $p$  value  $< 0.01$ . A lower  $p$ -value suggests a higher level of statistical significance.

**Table S4: Statistical evaluation of satellite-retrieved wildfire  $SPH$  products against WCL-determined  $SPH$  observations using the matched pair method.  $N$  – the number of collocated pairs;  $STD$  – standard deviation;  $Q_{25}$  – lower quartile, 25% of the data lie below this value;  $Q_{50}$  – median, 50% of the data lie below this value;  $Q_{75}$  – upper quartile, 25% of the data lie above this value;  $MB$  – mean bias;  $MAE$  – mean absolute error;  $RMSE$  – root mean square error;  $r$  – Pearson's correlation coefficient score.**

|                                                    | WCL-Determined $SPH$ |                     |
|----------------------------------------------------|----------------------|---------------------|
|                                                    | $SPH^{top}$          | $SPH^{ext}$         |
| <b>MODIS-Terra/MAIAC</b>                           |                      |                     |
| $N$                                                | 163                  |                     |
| Lidar Observations Mean $\pm 1$ $STD$ (km)         | 2.162 $\pm$ 0.542    | 1.382 $\pm$ 0.368   |
| Satellite Retrievals Mean $\pm 1$ $STD$ (km)       | 0.700 $\pm$ 0.550    |                     |
| Lidar Observations $Max/Min$ (km)                  | 3.903/1.254          | 2.253/0.800         |
| Satellite Retrievals $Max/Min$ (km)                | 2.650/0.004          |                     |
| Lidar Observations $Q_{25}, Q_{50}, Q_{75}$ (km)   | 1.776, 2.064, 2.508  | 1.131, 1.298, 1.581 |
| Satellite Retrievals $Q_{25}, Q_{50}, Q_{75}$ (km) | 0.325, 0.643, 0.952  |                     |
| $MB$ (km)                                          | -1.462               | -0.683              |
| $MAE$ (km)                                         | 1.462                | 0.737               |
| $RMSE$ (km)                                        | 1.664                | 0.919               |
| $r$                                                | -0.055               | 0.146               |
| <b>MODIS-Aqua/MAIAC</b>                            |                      |                     |
| $N$                                                | 114                  |                     |
| Lidar Observations Mean $\pm 1$ $STD$ (km)         | 2.686 $\pm$ 0.797    | 1.790 $\pm$ 0.644   |
| Satellite Retrievals Mean $\pm 1$ $STD$ (km)       | 0.370 $\pm$ 0.258    |                     |
| Lidar Observations $Max/Min$ (km)                  | 4.215/1.374          | 3.422/0.800         |
| Satellite Retrievals $Max/Min$ (km)                | 1.109/0.025          |                     |
| Lidar Observations $Q_{25}, Q_{50}, Q_{75}$ (km)   | 2.063, 2.627, 3.350  | 1.274, 1.728, 2.325 |
| Satellite Retrievals $Q_{25}, Q_{50}, Q_{75}$ (km) | 0.146, 0.308, 0.579  |                     |
| $MB$ (km)                                          | -2.317               | -1.419              |
| $MAE$ (km)                                         | 2.315                | 1.419               |
| $RMSE$ (km)                                        | 2.444                | 1.564               |

|                                                   |                     |                     |
|---------------------------------------------------|---------------------|---------------------|
| <i>r</i>                                          | <b>0.220 *</b>      | 0.148               |
| <b>MISR/MERLIN</b>                                |                     |                     |
| <i>N</i>                                          |                     | 90                  |
| Lidar Observations Mean $\pm 1$ <i>STD</i> (km)   | 2.216 $\pm$ 0.506   | 1.498 $\pm$ 0.449   |
| Satellite Retrievals Mean $\pm 1$ <i>STD</i> (km) |                     | 2.114 $\pm$ 0.731   |
| Lidar Observations <sup>Max/Min</sup> (km)        | 2.982/1.254         | 2.253/0.853         |
| Satellite Retrievals <sup>Max/Min</sup> (km)      |                     | 3.480/0.625         |
| Lidar Observations <i>Q25, Q50, Q75</i> (km)      | 1.791, 2.204, 2.648 | 1.129, 1.428, 1.969 |
| Satellite Retrievals <i>Q25, Q50, Q75</i> (km)    |                     | 1.576, 1.965, 2.729 |
| <i>MB</i> (km)                                    | -0.102              | 0.616               |
| <i>MAE</i> (km)                                   | 0.494               | 0.782               |
| <i>RMSE</i> (km)                                  | 0.688               | 0.867               |
| <i>r</i>                                          | <b>0.444 **</b>     | <b>0.556 **</b>     |
| <b>VIIRS/ASHE</b>                                 |                     |                     |
| <i>N</i>                                          |                     | 130                 |
| Lidar Observations Mean $\pm 1$ <i>STD</i> (km)   | 2.823 $\pm$ 0.999   | 1.895 $\pm$ 0.890   |
| Satellite Retrievals Mean $\pm 1$ <i>STD</i> (km) |                     | 2.707 $\pm$ 1.165   |
| Lidar Observations <sup>Max/Min</sup> (km)        | 5.493/1.497         | 4.003/0.811         |
| Satellite Retrievals <sup>Max/Min</sup> (km)      |                     | 4.930/0.231         |
| Lidar Observations <i>Q25, Q50, Q75</i> (km)      | 1.977, 2.904, 3.318 | 1.094, 1.629, 2.489 |
| Satellite Retrievals <i>Q25, Q50, Q75</i> (km)    |                     | 2.060, 2.683, 3.579 |
| <i>MB</i> (km)                                    | -0.116              | 0.812               |
| <i>MAE</i> (km)                                   | 1.190               | 1.594               |
| <i>RMSE</i> (km)                                  | 1.697               | 1.806               |
| <i>r</i>                                          | <b>-0.220 *</b>     | <b>-0.220 *</b>     |
| <b>TROPOMI/ALH</b>                                |                     |                     |
| <i>N</i>                                          |                     | 127                 |
| Lidar Observations Mean $\pm 1$ <i>STD</i> (km)   | 2.677 $\pm$ 1.075   | 1.894 $\pm$ 0.936   |
| Satellite Retrievals Mean $\pm 1$ <i>STD</i> (km) |                     | 2.052 $\pm$ 0.588   |
| Lidar Observations <sup>Max/Min</sup> (km)        | 5.493/1.374         | 4.003/0.734         |
| Satellite Retrievals <sup>Max/Min</sup> (km)      |                     | 3.425/1.412         |
| Lidar Observations <i>Q25, Q50, Q75</i> (km)      | 1.718, 2.337, 3.308 | 1.019, 1.542, 2.684 |
| Satellite Retrievals <i>Q25, Q50, Q75</i> (km)    |                     | 1.546, 1.802, 2.431 |
| <i>MB</i> (km)                                    | -0.625              | 0.158               |
| <i>MAE</i> (km)                                   | 0.832               | 0.847               |
| <i>RMSE</i> (km)                                  | 1.304               | 0.991               |
| <i>r</i>                                          | 0.151               | <b>0.241 **</b>     |

Note that the Pearson's correlation coefficient scores (*r*) in bold demonstrate a statistically significant relationship between the two variables; the symbol \* signifies a *p* value < 0.05 and \*\* indicates a *p* value < 0.01. A lower *p*-value suggests a higher level of statistical significance.

Location: 43.254°N, 113.91°W  
Flight Name: 20180803a

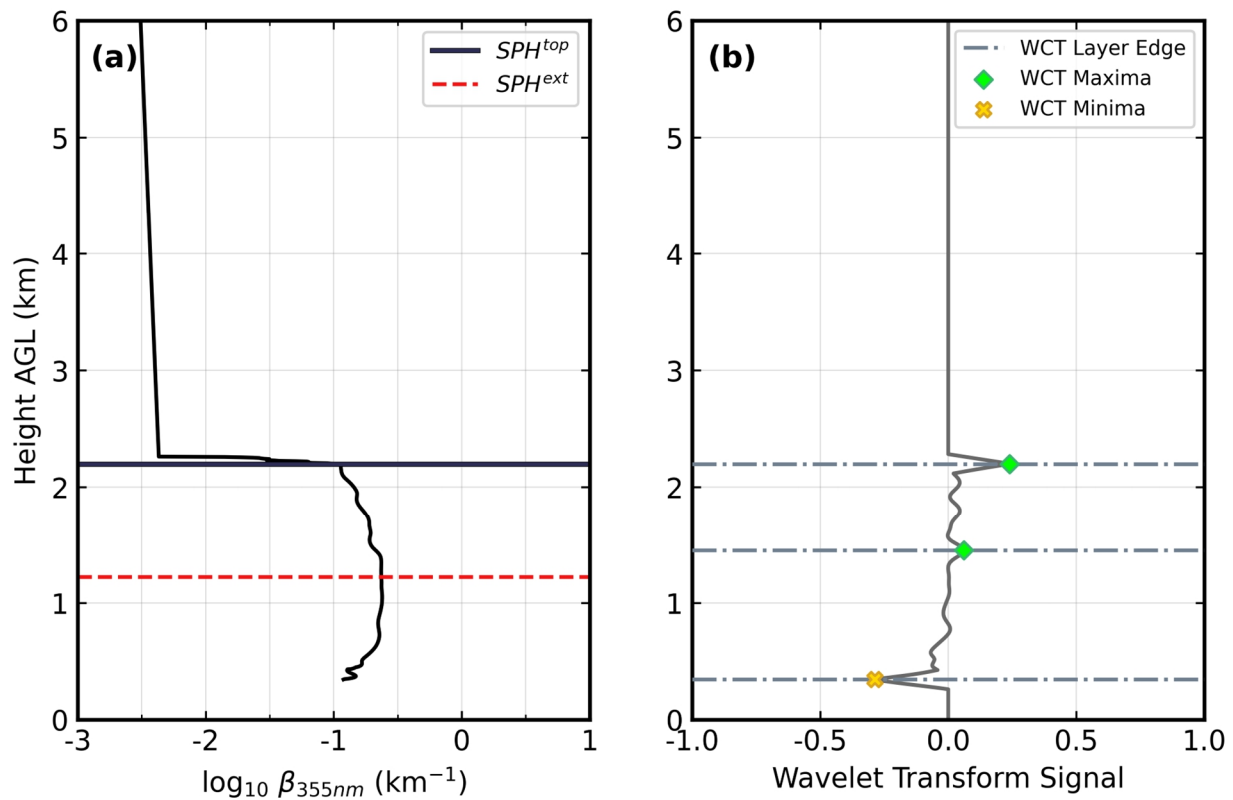

Figure S1: An example of a single-layered aerosol structure is presented here as evidenced by (a) the WCL aerosol extinction coefficient profile at 355 nm derived from the composite airborne lidar vertical cross-section and (b) the resulting WCT profile, on 3 August 2018 at a location (43.254° N, 113.91° W). In (a) the dashed red line represents the calculated  $SPH^{top}$ , while the calculated  $SPH^{ext}$  is shown as the solid blue line for comparison. In (b) the WCT-detected aerosol layer top (or bottom) is the horizontal dash-dotted grey line. The chromatic icons denote the local maxima (green, “diamond”) and minima (yellow, “x”) of the signal obtained through the WCT methodology.

Location: 43.424°N, 113.91°W  
Flight Name: 20180803a

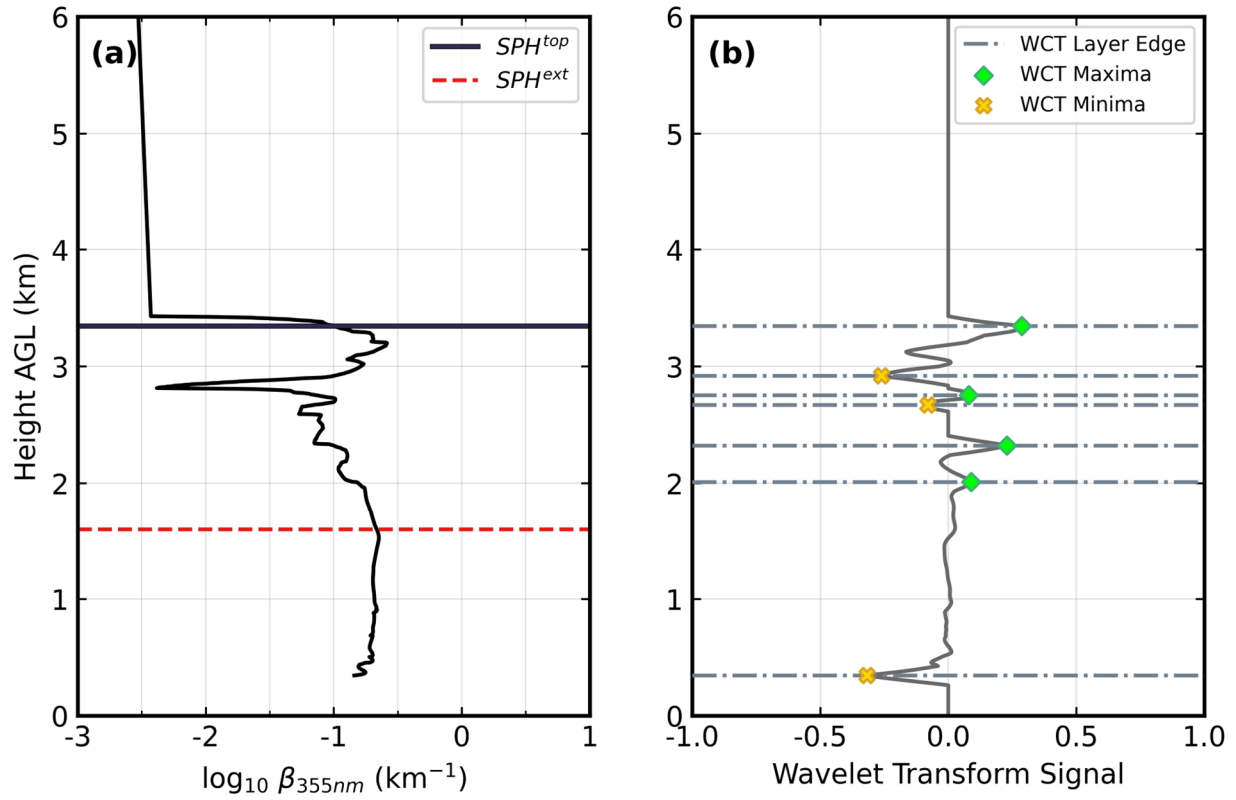

Figure S2: Another example has the same logic as shown in Figure S1, but for a multi-layered aerosol structure case on 3 August 2018 at a location (43.424° N, 113.91° W).

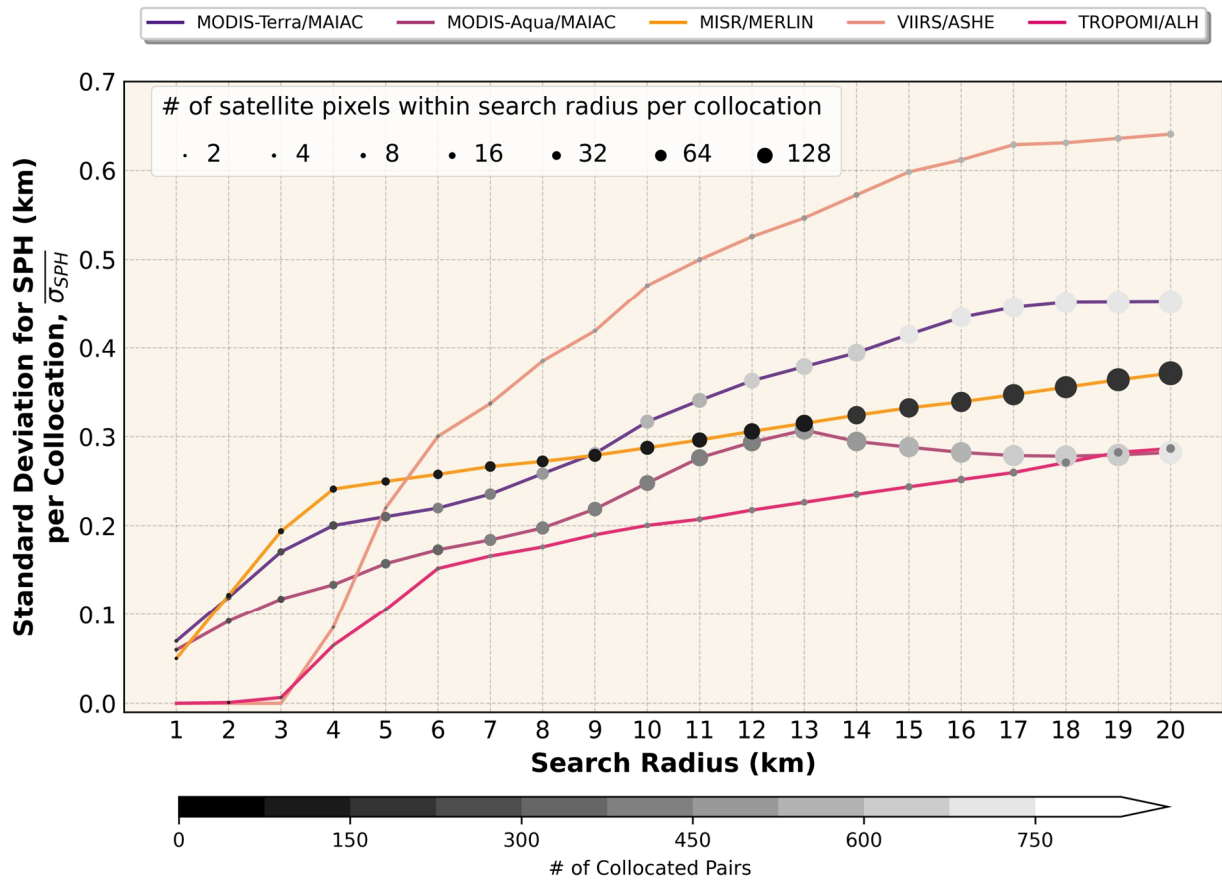

Figure S3: The *STD* for *SPH* per collocation of MODIS-Terra/MAIAC, MODIS-Aqua/MAIAC, MISR/MERLIN, VIIRS/ASHE, and TROPOMI/ALH as a function of search radius, for all successful collocations during the August 2018 BB-FLUX field campaign when the searching time window is set to 12 minutes. The color bar depicts the total number of collocation pairs between satellite and lidar observations. The larger the scatter point size, the greater the number of satellite pixels inside the circular area of a given search radius. A detailed workflow for the collocation methodology is demonstrated as follows. First, only those satellite pixels are picked that lie within the distance ranging from 1 km to 20 km and whose observation time is within 12 minutes from a given lidar point. From within this selected subset of satellite data, a nearest-neighbor search discovers one satellite pixel closest to the lidar point and the nearby satellite pixels inside the circular area of a certain search radius are also counted, if any. When that collocation is found, satellite-retrieved *SPH* value (AGL), lidar-determined *SPH* value (AGL), collocation's geolocations and associated satellite pixel counts in the sampling area around a lidar point are extracted and stored. Second, as seen in Figure SI.3, the search radius range will be narrowed down when the *STDs* of satellite-retrieved *SPH* products are above zero with a number of neighbors at least two. Finally, the best search radius is sorted based on the total collocation numbers but with a minimal value in satellite-retrieved *SPH* variations.



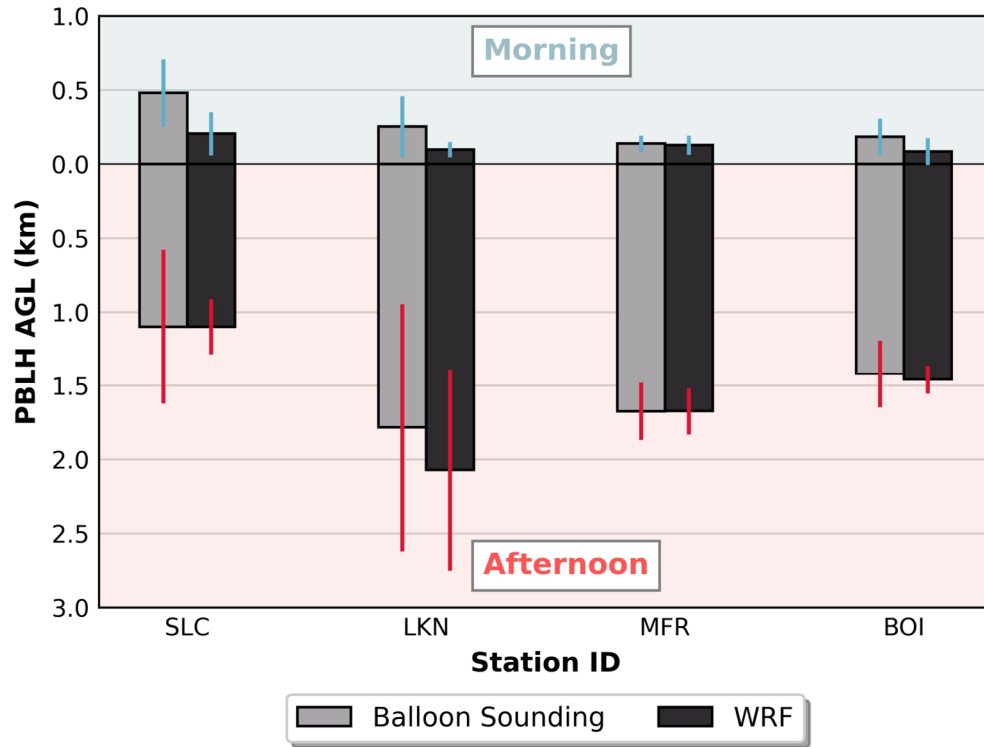

Figure S4: Diel averages (at 00Z-Afternoon and at 12Z-Morning, respectively) of *PBLH* with error bars derived from balloon soundings and WRF simulations during August 2018. Because there is uncertainty in the *PBLH* calculated in WRF these values are not used directly, but instead the PBL from WRF is calculated in the same manner as the balloon data, using the vertical potential temperature gradient method or the Richardson number method.

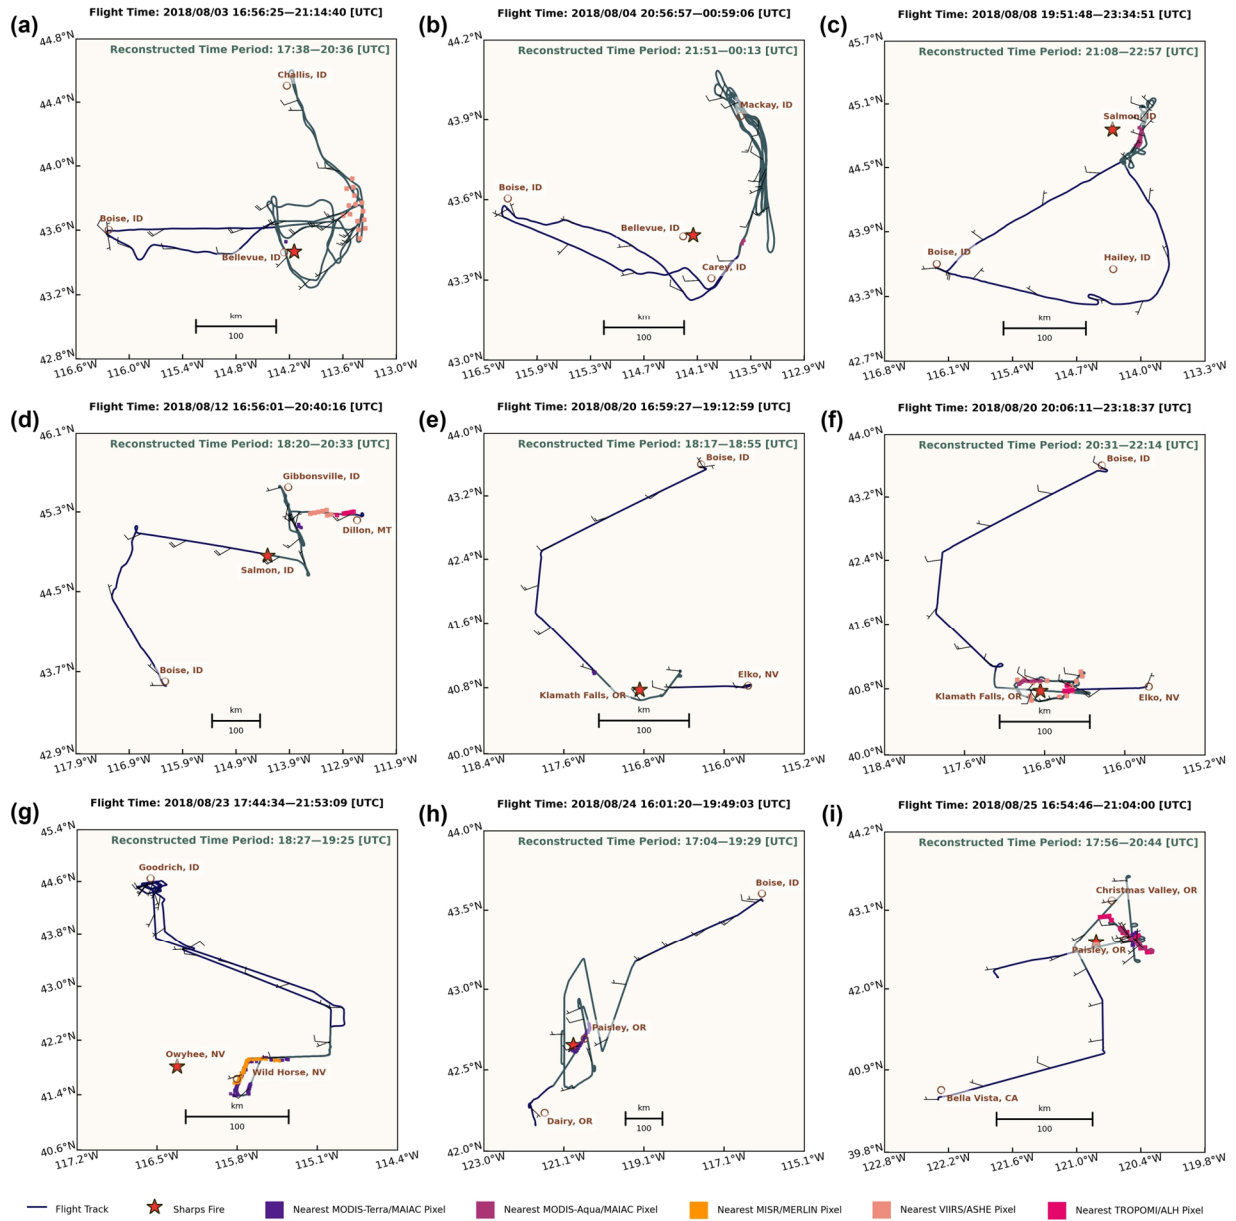

Figure S5: The other nine UWKA flight tracks selected from the August 2018 BB-FLUX campaign highlighted by reconstructed time periods are associated with four different kinds of satellite collocations: (a) 20180803a; (b) 20180804b; (c) 20180808b; (d) 20180812a; (e) 20180820a; (f) 20180820b; (g) 20180823a; (h) 20180824a; (i) 20180825a.

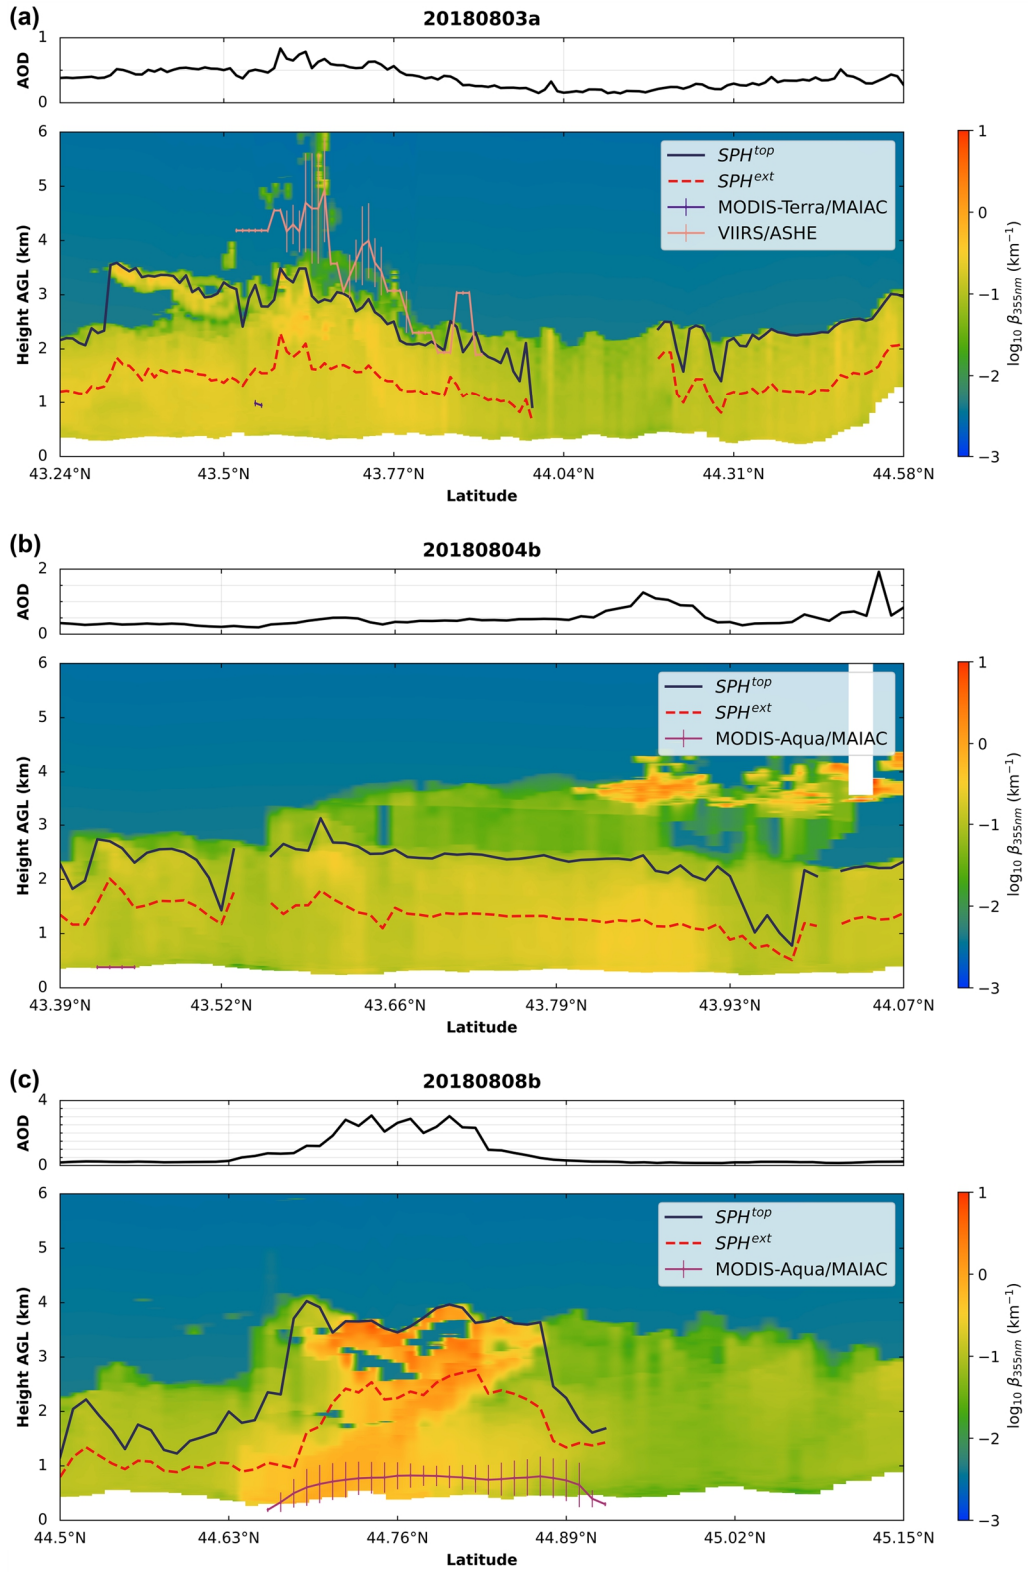

Figure S6: Cont.

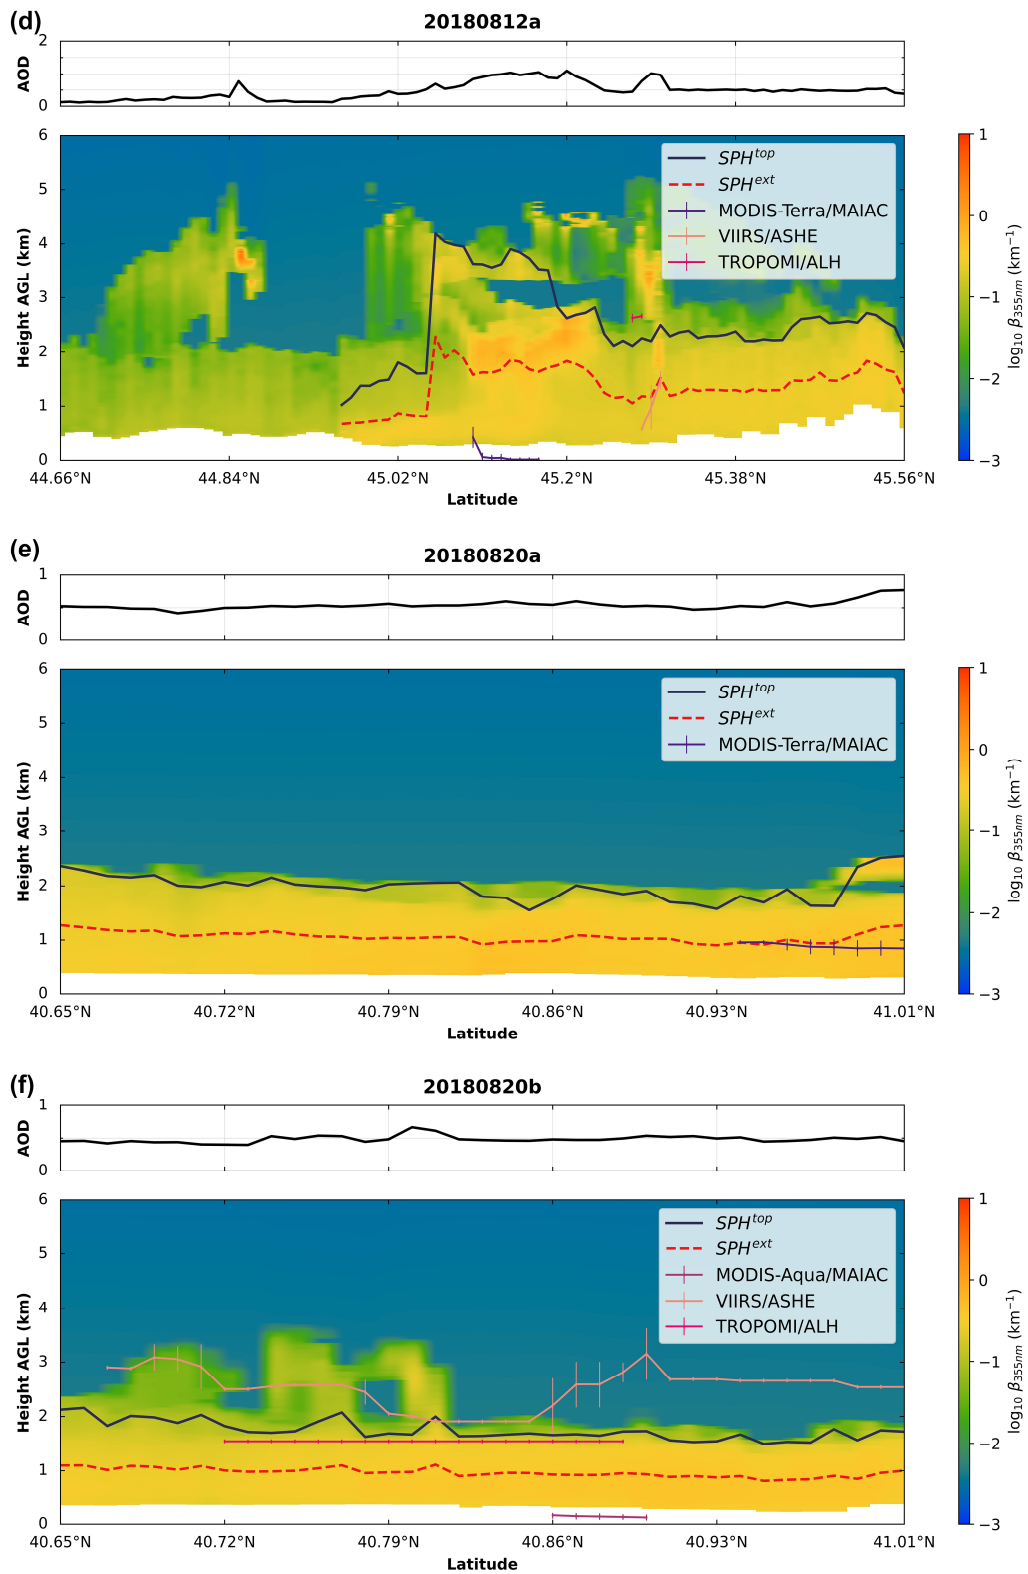

Figure S6: Cont.

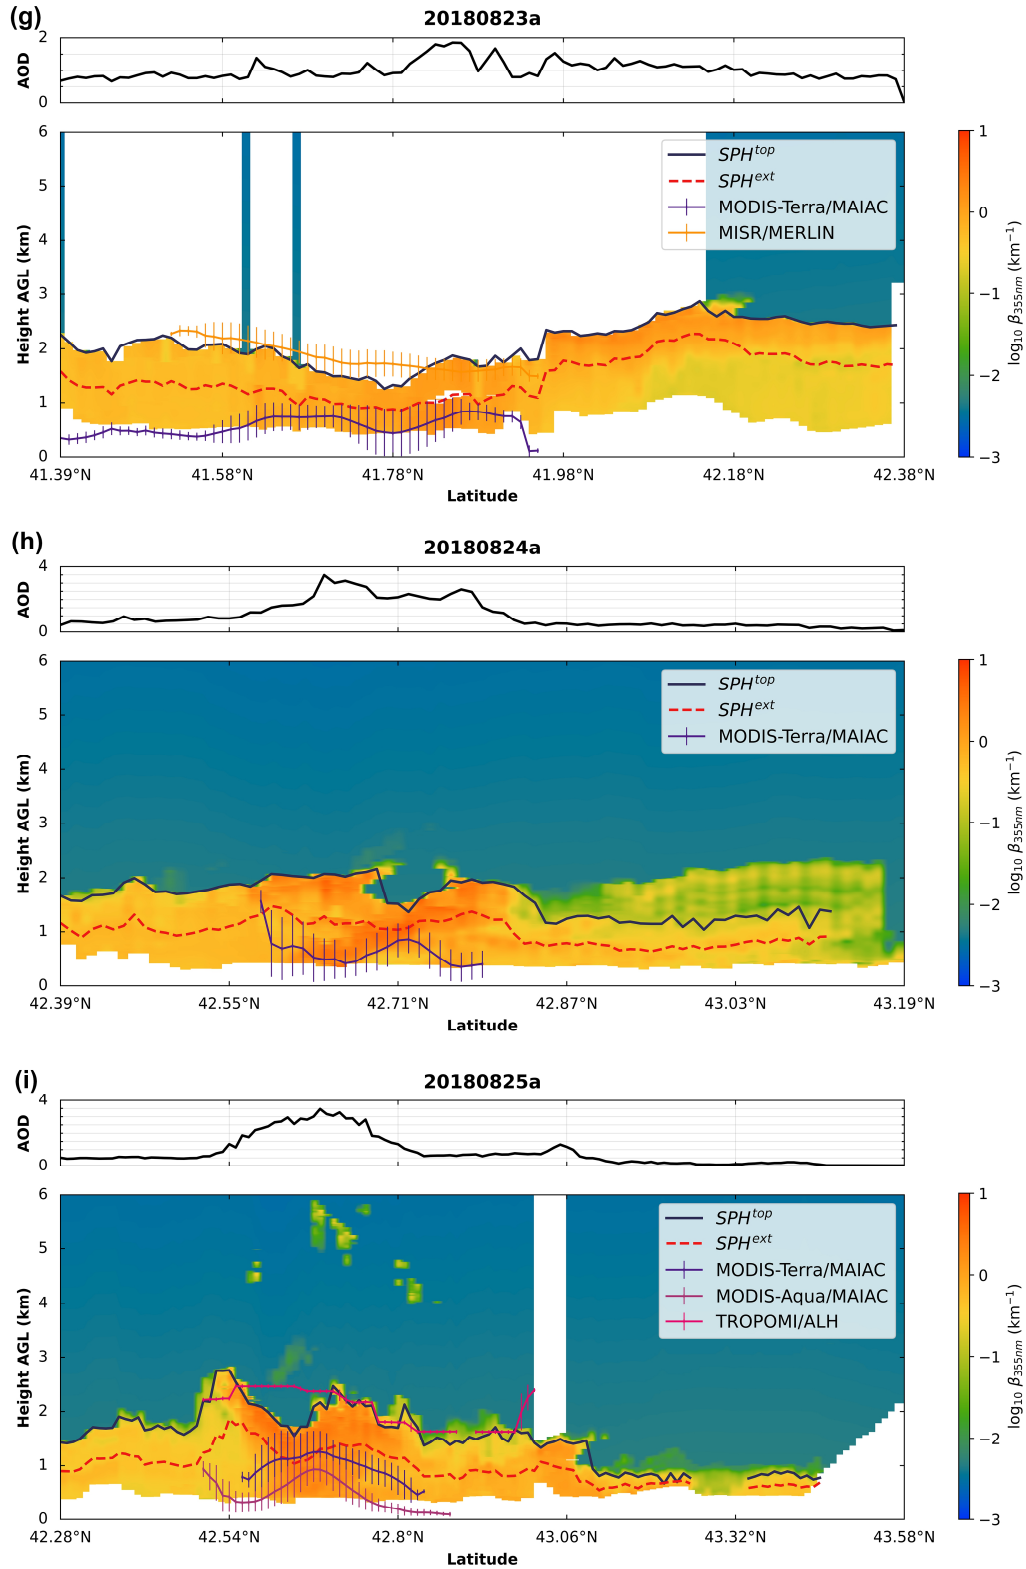

Figure S6: (Top panel) AOD variations at 355 nm along the eleven reconstructed flight tracks; (bottom panel) composite latitude-height cross-sections of WCL vertical aerosol extinction coefficient overlaid by WCL-determined  $SPHs$  (i.e.,  $SPH^{top}$  and  $SPH^{ext}$ ) as well as satellite-derived  $SPHs$  during the August 2018 BB-FLUX campaign: (a) 20180803a; (b) 20180804b; (c) 20180808b; (d) 20180812a; (e) 20180820a; (f) 20180820b; (g) 20180823a; (h) 20180824a; (i) 20180825a.

## References

- Chen, S.-H. and Sun, W.-Y.: A One-dimensional Time Dependent Cloud Model, *Journal of the Meteorological Society of Japan*, Ser. II, 80, 99–118, <https://doi.org/10.2151/jmsj.80.99>, 2002.
- Grell, G. A. and Dévényi, D.: A generalized approach to parameterizing convection combining ensemble and data assimilation techniques, *Geophys. Res. Lett.*, 29, 38–1, 2002.
- Hong, S.-Y., Noh, Y., and Dudhia, J.: A new vertical diffusion package with an explicit treatment of entrainment processes, *Mon. Weather Rev.*, 134, 2318–2341, 2006.
- Iacono, M. J., Delamere, J. S., Mlawer, E. J., Shephard, M. W., Clough, S. A., and Collins, W. D.: Radiative forcing by long-lived greenhouse gases: Calculations with the AER radiative transfer models, *J. Geophys. Res. Atmospheres*, 113, 2008.
- Jiménez, P. A., Dudhia, J., González-Rouco, J. F., Navarro, J., Montávez, J. P., and García-Bustamante, E.: A revised scheme for the WRF surface layer formulation, *Mon. Weather Rev.*, 140, 898–918, 2012.
- Tewari, M., Chen, F., Wang, W., Dudhia, J., LeMone, M., Mitchell, K., Ek, M., Gayno, G., and Wegiel, J.: Implementation and verification of the unified NOAA land surface model in the WRF model, *Proceedings of the 20th conference on weather analysis and forecasting/16th conference on numerical weather prediction*, Seattle, WA, USA, 2004.
